# Supplementary material for: Fast label-free recognition of NRBCs by deep-learning visual object detection and single-cell Raman spectroscopy
Source: Royal Society of Chemistry journal article supplement (doi:10.1039/d2an00024e), 2022-01-01
Supplement: d2an00024e2.pdf [file d2an00024e2.pdf]

*Supplementary Information for*

**Fast Label-Free Recognition of NRBCs by Deep-Learning Visual Object Detection and Single-Cell Raman Spectroscopy**

Teng Fang,<sup>1, †</sup> Pengbo Yuan,<sup>2, †</sup> Chen Gong,<sup>2, 3</sup> Yueping Jiang,<sup>2</sup> Yuezhou Yu,<sup>4</sup> Wenhao Shang,<sup>4</sup> Chan Tian,<sup>2, 3, 5 \*</sup>, Anpei Ye<sup>1, 4, \*</sup>

1. Key Laboratory for the Physics and Chemistry of Nanodevices, School of Electronics, Peking University, Beijing 100871, China
2. National Clinical Research Center for Obstetrics and Gynecology, Department of Obstetrics and Gynecology, Peking University Third Hospital, Beijing 100191, China
3. Beijing Key Laboratory of Reproductive Endocrinology and Assisted Reproductive Technology, Center for Reproductive Medicine, Peking University Third Hospital, Beijing 100191, China
4. Academy for Advanced Interdisciplinary Studies, Peking University, Beijing 100871, China
5. Department of Medical Genetics, Center for Medical Genetics, Peking University Health Science Center, Beijing 100191, China

† These authors contributed equally.

\* Corresponding author: Anpei Ye, yap@pku.edu.cn; Chan Tian, tianchan@bjmu.edu.cn

Table S1. The assignments of Raman bands in hb<sup>+</sup> spectra.

| Raman band (cm <sup>-1</sup> )        |              | Assignment                                         |
|---------------------------------------|--------------|----------------------------------------------------|
| Previous works                        | Present work |                                                    |
| 677 <sup>1</sup>                      | 677          | δ (pyr deform) <sub>sym</sub>                      |
| 754 <sup>2</sup>                      | 754          | ν (pyr breathing)                                  |
| 974 <sup>1</sup>                      | 975          | γ (C <sub>α</sub> H=)                              |
| 992 <sup>1</sup>                      | 991          | ν (C <sub>β</sub> C <sub>1</sub> ) <sub>asym</sub> |
| 1072 <sup>1</sup>                     | 1072         | δ (=C <sub>b</sub> H <sub>2</sub> ) <sub>4</sub>   |
| 1127 <sup>1</sup>                     | 1125         | ν (C <sub>β</sub> -methyl)                         |
| 1170 <sup>1</sup>                     | 1170         | ν (pyr half-ring) <sub>asym</sub>                  |
| 1215 <sup>2</sup>                     | 1215         | δ (C <sub>m</sub> H)                               |
| 1301 <sup>3</sup> , 1305 <sup>1</sup> | 1299         | δ (C <sub>m</sub> H)                               |
| 1336 <sup>2</sup>                     | 1338         | ν (pyr quarter ring) <sub>sym</sub>                |
| 1356 <sup>1</sup> , 1358 <sup>2</sup> | 1354         | ν (pyr half ring) <sub>sym</sub>                   |
| 1384 <sup>1</sup>                     | 1385         | ν (pyr half ring) <sub>sym</sub>                   |
| 1423 <sup>3</sup>                     | 1419         | ν (C <sub>α</sub> C <sub>m</sub> ) <sub>sym</sub>  |
| 1448 <sup>1</sup>                     | 1450         | δ(CH <sub>2</sub> /CH <sub>3</sub> )               |
| 1547 <sup>1</sup>                     | 1545         | ν (C <sub>β</sub> C <sub>β</sub> )                 |
| 1582 <sup>1</sup>                     | 1579         | ν (C <sub>α</sub> C <sub>m</sub> ) <sub>asym</sub> |
| 1604 <sup>2</sup>                     | 1601         | ν(C <sub>α</sub> =C <sub>b</sub> )                 |

Abbreviations: pyr, pyrrole rings

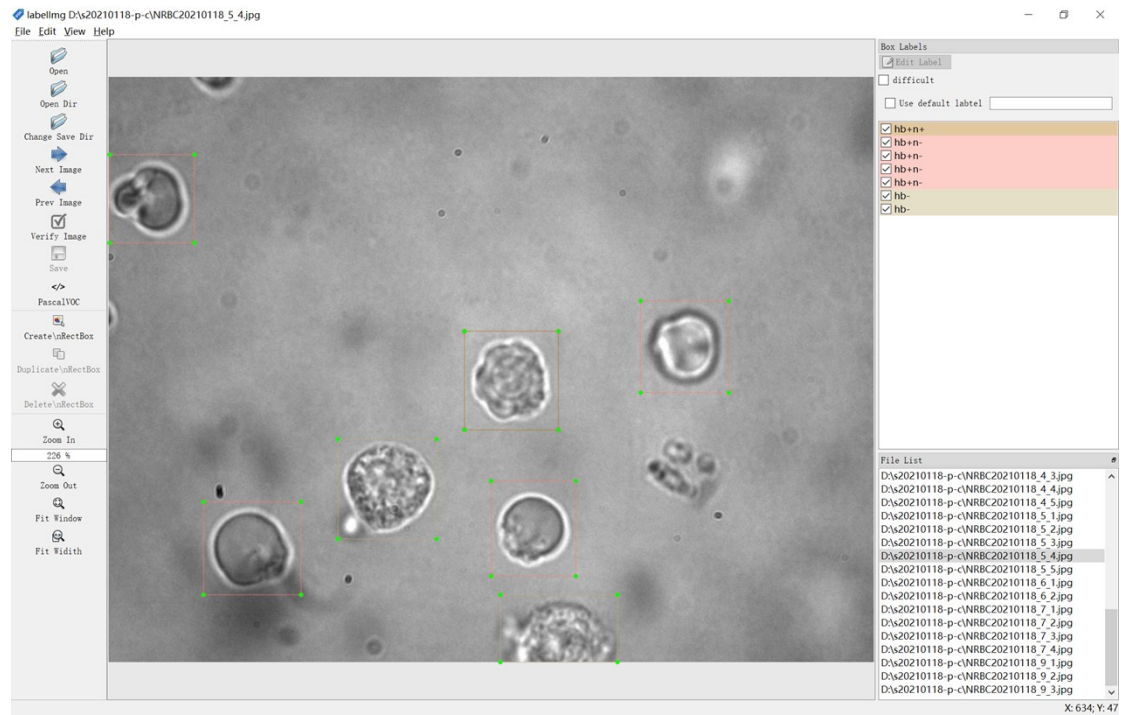

Figure S1. An example of dataset made by *LabelImg*. The cells in an image would be annotated by rectangular bounding boxes with corresponding class names. The final annotation file would be generated as Pascal VOC format to describe the image.

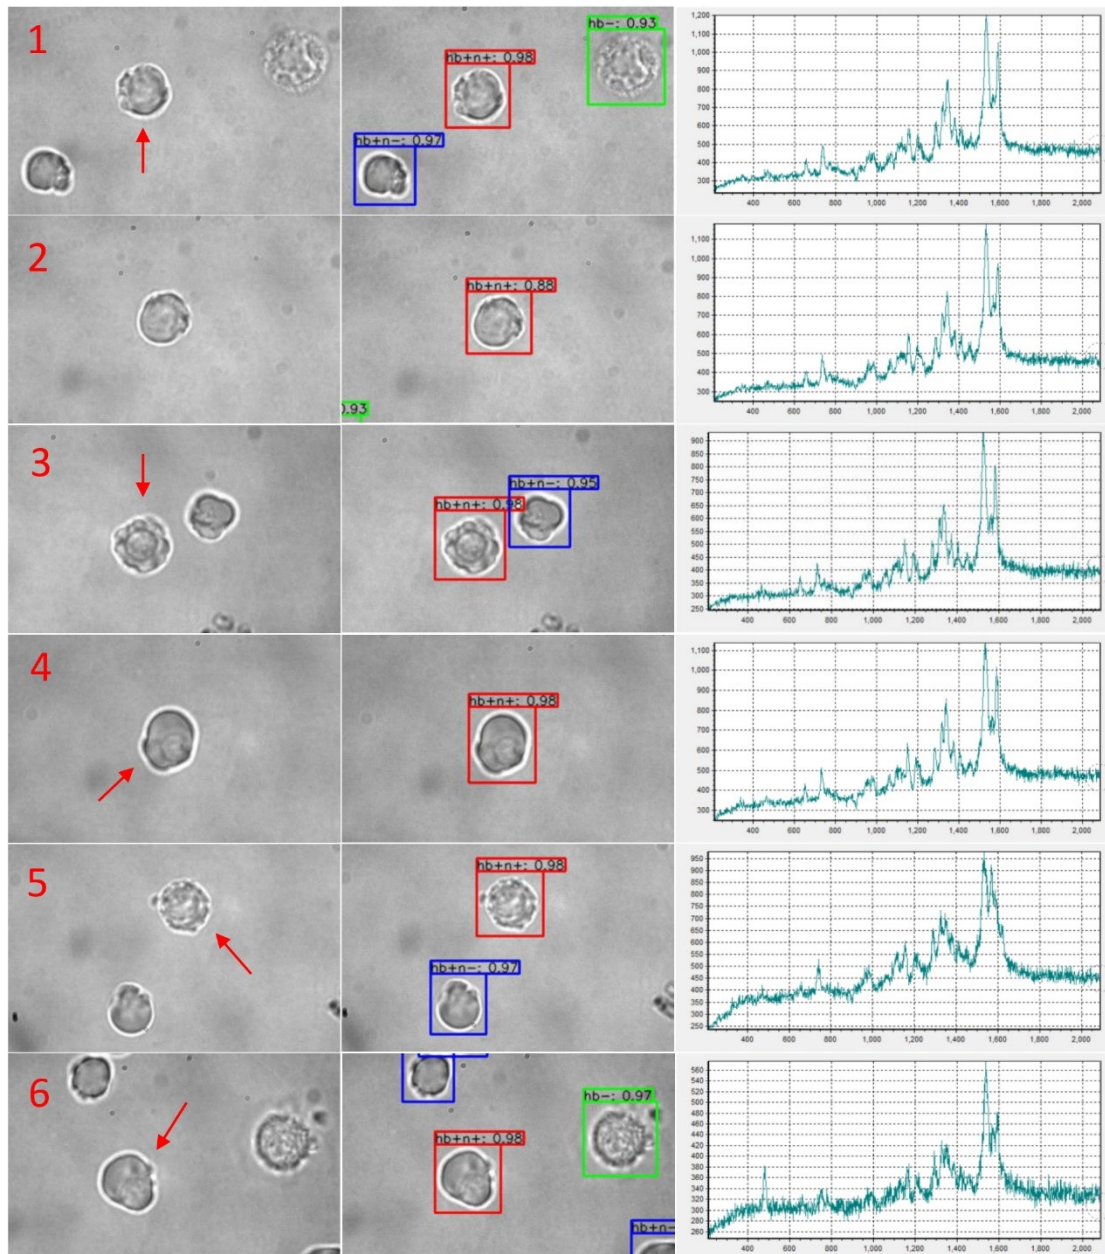

Figure S2. The six NRBCs found in maternal peripheral blood: raw microscopic images (left column), real-time detection results by YOLOv3 (middle column, the color system of cell annotation is the same as in Figure 3), and corresponding Raman spectra that did contain hemoglobin signals (right column).

## References

1. B. R. Wood, P. Caspers, G. J. Puppels, S. Pandiancherri and D. McNaughton, *Anal. Bioanal. Chem.*, 2007, **387**, 1691-1703.
2. S. Ahlawat, N. Kumar, A. Uppal and P. Kumar Gupta, *J Biophotonics*, 2017, **10**, 415-422.
3. A. Bankapur, E. Zachariah, S. Chidangil, M. Valiathan and D. Mathur, *PLoS One*, 2010, **5**, e10427.
